# Supplementary material
Source: publisher site journal article supplement (https://www.spandidos-publications.com/4464/downloadSupplementary)
Supplement: Supplementary file 1 [file downloadSupplementary]

**Table SI.** Demographic characteristics and clinicopathological characteristics of 12 GLM cases and 12 control subjects.

| Item                      | GLM<br>(n=12)      | Control<br>(n=12)  | P-value |
|---------------------------|--------------------|--------------------|---------|
| Age, years                | 30.83±4.78 (23-39) | 34.67±8.71 (23-57) | 0.195   |
| BMI, kg/m <sup>2</sup>    | 22.06±3.34         | 24.30±3.92         | 0.145   |
| WBC, x10 <sup>9</sup> /l  | 9.10±2.07          | 7.11±3.06          | 0.014   |
| NEUT, x10 <sup>9</sup> /l | 6.74±2.09          | 5.13±2.97          | 0.007   |
| NLR                       | 4.15±2.23          | 2.68±0.78          | 0.045   |
| CRP, mg/l                 | 5.99±3.89          | 2.28±2.89          | 0.010   |

Patients with GLM had a large amount of inflammatory cell infiltrate, granuloma formation. The control subjects had fibrous tissue and glandular epithelium hyperplasia in lobules of the mammary gland and hyperplasia of fibrous tissue surrounding the ducts. Values are expressed as the mean ±standard deviation (range). BMI, body mass index; WBC, white blood cell; NEUT, neutrophilic granulocyte; NLR, neutrophil to lymphocyte ratio; CRP, C-reactive protein.
